# Supplementary material for: Virtual Mutagenesis of the Yeast Cyclins Genetic Network Reveals Complex Dynamics of Transcriptional Control Networks
Source: PLoS One. 2011 Apr 25;6(4):e18827. doi: 10.1371/journal.pone.0018827 (PMC3081828; doi:10.1371/journal.pone.0018827)
Supplement: Text S1 — Integration of the model given by Eq. 1. (DOC) [file pone.0018827.s002.doc]

Integration of the model given by Eq. 1

Let ,

|  | A1 |
| --- | --- |

|  | A2 |
| --- | --- |

From (A1) and z(t = 0) = z0

Equation A2 was used to compute target gene expression profiles.
